# Supplementary material for: Exploiting high quality PEDOT:PSS–SWNT composite formulations for wet-spinning multifunctional fibers
Source: Royal Society of Chemistry journal article supplement (doi:10.1039/c2jm35148j), 2012-01-01
Supplement: c2jm35148j.pdf [file c2jm35148j.pdf]

# Exploiting High Quality PEDOT:PSS/SWNT Composite Formulations for Wet-Spinning Multifunctional Fibers

Rouhollah Jalili, Joselito M. Razal\* and Gordon G. Wallace\*

*Received (in XXX, XXX) Xth XXXXXXXXXX 20XX, Accepted Xth XXXXXXXXXX 20XX*

<sup>5</sup> DOI: 10.1039/b000000x

*Intelligent Polymer Research Institute, ARC Centre of Excellence for Electromaterials Science, AIM Facility, Innovation Campus, University of Wollongong, Wollongong, NSW, 2522, Australia. Fax: +61 2 4221 3114; Tel: +61 2 4221 3127; E-mail: jrazal@uow.edu.au, gwallace@uow.edu.au*

## The supplementary information

### Increasing the SWNT loading

Achieving SWNT loadings higher than  $0.02 V_f$ , was possible only by increasing the SDS-SWNT stock dispersion concentrations. Therefore, a second SDS-SWNT stock concentration of  $2.2 \text{ mg ml}^{-1}$  (after centrifugation of a  $3 \text{ mg ml}^{-1}$ ) was made up to prepare formulations with SWNT loadings greater than  $0.02 V_f$ . The mass ratio of the surfactant (SDS) to SWNT was critical for the formation of a good dispersion at such a high concentration. We experimentally found the optimum mass fraction of SDS to the SWNT to be around 3 to 5. When the concentration of SDS was lower, stabilization was inadequate. Table S1 lists a summary of all the dispersions and spinning formulations used to prepare fibers reported here.

**Table S1.** Summary of the PEDOT:PSS/ SWNT spinning solution composition and the calculated SWNT loading in the resultant fiber.

| SDS-SWNT<br>[ml] | Water<br>[ml] | PEDOT:PSS<br>[mg] | total solid content<br>[mg ml <sup>-1</sup> ] | SDS<br>Mass fraction | PEDOT:PSS<br>mass fraction | SWNT<br>Volume fraction [c] |
|------------------|---------------|-------------------|-----------------------------------------------|----------------------|----------------------------|-----------------------------|
| 0                | 1             | 20                | 20.0                                          | 0                    | 100                        | 0                           |
| 1[a]             | 1.5           | 70                | 30.2                                          | 6.6                  | 92.7                       | 0.005                       |
| 1[a]             | 0.5           | 32                | 25                                            | 13.3                 | 85.3                       | 0.01                        |
| 1[a]             | 0.27          | 20                | 25.5                                          | 19.6                 | 78.4                       | 0.015                       |
| 1[a]             | 0             | 15                | 20.5                                          | 24.4                 | 73.2                       | 0.018                       |
| 1[a]             | 0             | 12.5              | 18                                            | 27.7                 | 69.4                       | 0.020                       |
| 1[b]             | 1.2           | 34                | 20.5                                          | 19.9                 | 75.2                       | 0.037                       |
| 1[b]             | 0.5           | 19.5              | 20.5                                          | 29.3                 | 63.5                       | 0.054                       |
| 1[b]             | 0.2           | 11                | 20.1                                          | 40.5                 | 49.5                       | 0.074                       |
| 1[b]             | 0             | 6.5               | 17.7                                          | 50.8                 | 36.7                       | 0.092                       |
| 1[b]             | 0             | 3.9               | 15.1                                          | 59.6                 | 25.8                       | 0.11                        |

[a] The SDS-SWNT stock dispersion concentration used is  $0.5 \text{ mg ml}^{-1}$  and is obtained after a mild centrifugation (3000 g, 90 min) of a dispersion containing 1 mg SWNT, 5 mg SDS and 1 ml water.

[b] The SDS-SWNT stock dispersion used is  $2.2 \text{ mg ml}^{-1}$  and is obtained after a mild centrifugation (3000 g, 90 min) of a dispersion containing 3 mg SWNT, 9 mg SDS and 1 ml water.

[c] This SWNT volume fraction is calculated based on mass fraction of SWNT/PEDOT:PSS in spinning solution and with the assumption that no SWNT, SDS and PEDOT:PSS were lost in the wet spinning process (EQ S1). The densities of SWNT, SDS and PEDOT:PSS were assumed to be  $\sim 1.5$ ,  $\sim 1.01$  and  $\sim 1.1$ - $1.2 \text{ mg cm}^{-3}$ , respectively.

$$\text{SWNT volume fraction} = \left( \frac{V_{\text{SWNT}}}{V_{\text{Total}}} \right) = \left[ \frac{\left( \frac{m_{\text{SWNT}}}{\rho_{\text{SWNT}}} \right)}{\left( \left( \frac{m_{\text{SWNT}}}{\rho_{\text{SWNT}}} \right) + \left( \frac{m_{\text{SDS}}}{\rho_{\text{SDS}}} \right) + \left( \frac{m_{\text{PEDOT:PSS}}}{\rho_{\text{PEDOT:PSS}}} \right) \right)} \right] \quad (\text{EQ S1})$$

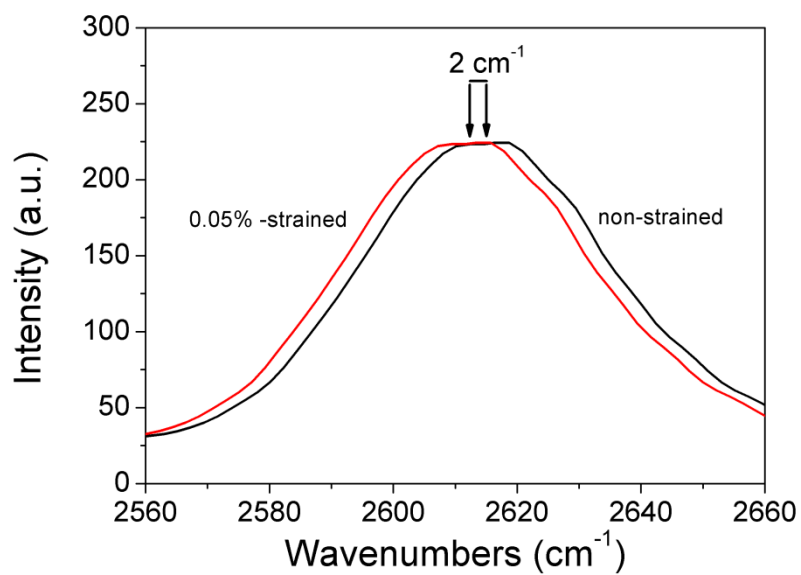

Fig S1. Variation of G' band of the Raman spectra of composite fibers under 0.05% strain.

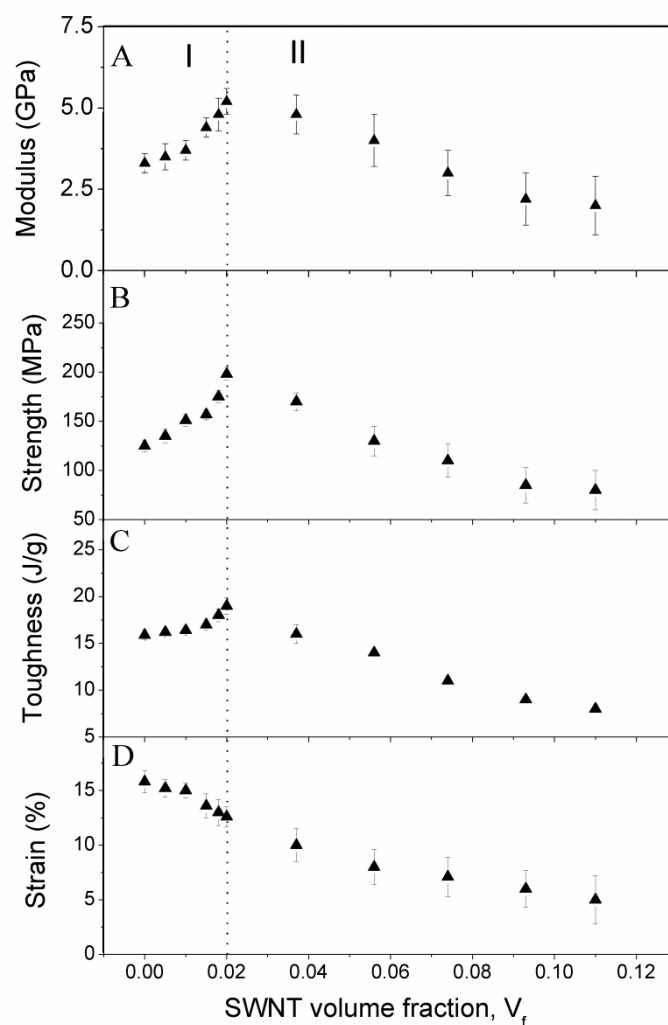

**Fig. S2** Comparison of the mechanical properties of PEDOT:PSS/SWNT composite fibers as a function of SWNT loading.

The addition of SWNT up to the loading of  $0.02 V_f$  resulted in a linear increase in modulus up to 5.2 GPa; however, the modulus decreased with SWNT loadings of more than  $0.02 V_f$  using the second SDS-SWNT stock dispersion.

As with modulus, reinforcement in strength occurred at two distinct SWNT loading regions. Addition of SWNT to more than  $0.02 V_f$  decreased the strength to  $\sim 80$  MPa at  $d\sigma/dV_f$  of  $-1.4$  GPa. The strength of fibers showed an extremely structure-sensitive property. In addition to bundling effects, we suggest that the non-covalently bound SDS and its significantly increased concentration in region II contributed to the observed distinct phase segregation with adversely affected the strength of the fiber at high SWNT loadings.

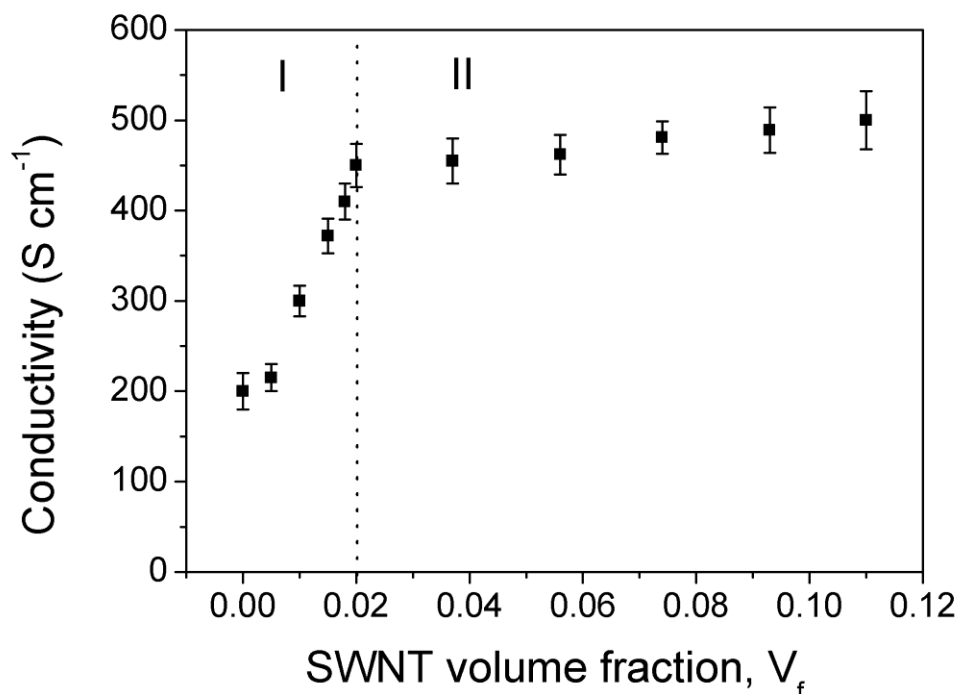

**Fig. S3** Comparison of the electrical properties of PEDOT:PSS/SWNT composite fibers as a function of SWNT loading. Region I is  $V_f \leq 0.02$  and II is  $V_f > 0.02$ .

5

Unlike the mechanical properties, electrical conductivities were found to increase with increasing volume fraction of SWNT in the first and second region. There was a sharp increase in conductivity (reaching up to  $450\text{ S cm}^{-1}$ ) achieved at SWNT loading of  $0.02 V_f$  followed by a slower linear increase in conductivity of up to  $\sim 500\text{ S cm}^{-1}$  at  $0.11 V_f$ . Structural defects and a much higher concentration of surfactant lowered the conductivity enhancement rate from  $dS/dV_f = 13300$  to

10  $500\text{ S cm}^{-1}$  from the first to the second region.

15

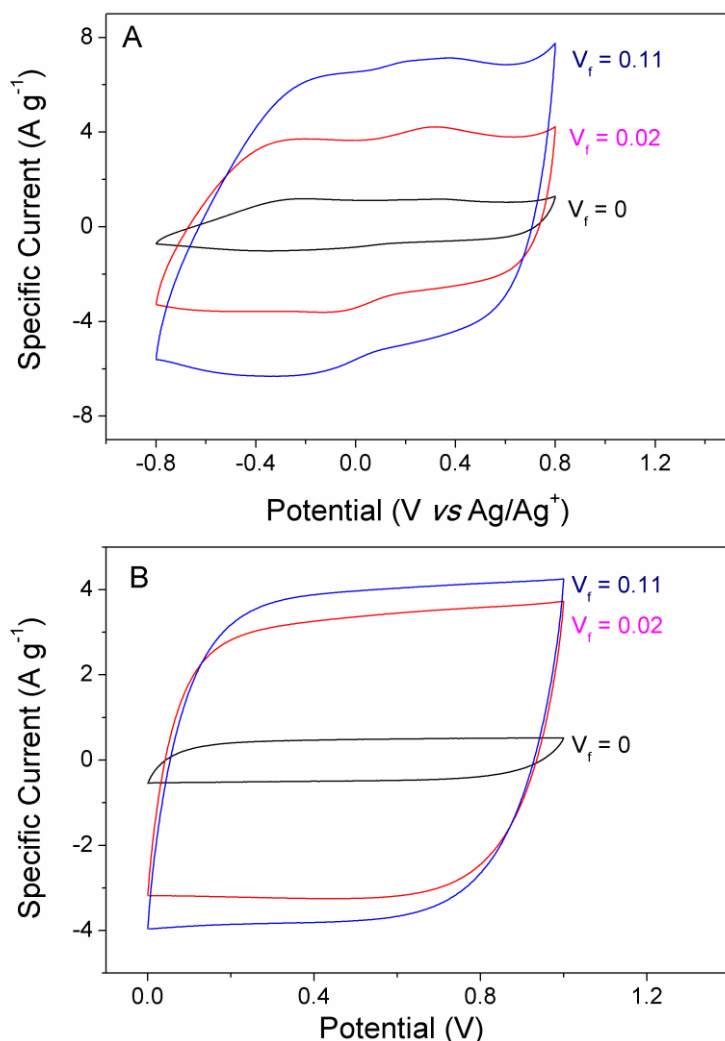

**Fig. S4** CV of PEDOT:PSS/SWNT composite fibers as a function of SWNT loading in 0.1 M TBABF<sub>4</sub>/acetonitrile taken at a scan rate of 50 mV s<sup>-1</sup>. A) three-electrode cell system when potential measured vs Ag/AgNO<sub>3</sub>. B) two-electrode (symmetric) cell.

5

Significant improvement in the specific capacitance that also was dependent on SWNT loading was observed. In comparison to the specific capacitance (two-electrode cell) of pure PEDOT:PSS fibers (10 F g<sup>-1</sup>), values of  $V_f$  0.02 and the highest SDS-SWNT loading resulted in approximately six-fold (59 F g<sup>-1</sup>) and eight-fold (77 F g<sup>-1</sup>) increases in the specific capacitance for composite fibers, respectively. Fiber from the first SDS-SWNT stock dispersion showed in a much higher rate of capacitance enhancement ( $dC_{esp}/dV_f = 2450 \text{ F g}^{-1}$  vs  $dC_{esp}/dV_f = 700 \text{ F g}^{-1}$ ) consistent with the higher rate of electrical conductivity.

**Table S2.** Comparison of some of the most successful CNT based composite fiber properties with presented work.

| Processing Details                                  | Reference   | SWNT loading           | Comments                          | Mechanical properties |                 |                |                      |            |                           | Electrical Conductivity |                            | Specific Capacitance       |
|-----------------------------------------------------|-------------|------------------------|-----------------------------------|-----------------------|-----------------|----------------|----------------------|------------|---------------------------|-------------------------|----------------------------|----------------------------|
|                                                     |             |                        |                                   | Modulus [GPa]         | $dY/dV_f$ [GPa] | Strength [MPa] | $d\sigma/dV_f$ [GPa] | Strain [%] | Toughness [ $J\ g^{-1}$ ] | $S\ cm^{-1}$            | $dS/dV_f$ [ $S\ cm^{-1}$ ] | [ $F\ g^{-1}$ ]            |
| Wet-spinning of PEDOT:PSS/SDS-SWNT composite        | This report | $V_f=0.02$<br>~ 3 wt % | ethylene glycol treatment         | 5.2                   | 89              | 200            | 3.2                  | 12.6       | 19                        | 455                     | 13300                      | 59 (2 cell)<br>67 (3 cell) |
| Wet-spinning of PANi-SWNT fibers                    | 2           | 0.76 wt%               | Chemical doping of PANi           | 7.3                   |                 | 255            |                      | 4          |                           | 716                     |                            |                            |
| Wet-spinning of HA-SWNT fibers                      | 3           | 67 wt%                 | coagulated in acid                | 13                    |                 | 110            |                      |            | 6-10                      | 537                     |                            | 44                         |
| Wet-spinning of DNA-SWNT fibers                     | 3           | 50 wt%                 |                                   |                       |                 |                |                      |            |                           | 150                     |                            |                            |
| Wet-spinning of CHT-SWNT fibers                     | 3           | 33 wt%                 |                                   |                       |                 |                |                      |            |                           | 21                      |                            |                            |
| Wet-spinning of DNA-SWNT-PVA fibers                 | 4           | 50 wt%                 | Annealed at 350 °C                | 14.5                  |                 | 101            |                      |            |                           | 166.7                   |                            | 0.1                        |
| Wet-spinning of SWNT-PVA fibers                     | 5           | 60 wt%                 |                                   |                       |                 |                |                      |            |                           | 0.2                     |                            |                            |
| Wet-spinning of SWNT-PVA fibers then remove polymer | 5           | 100 wt%                | Annealed at 1000 °C to remove PVA |                       |                 |                |                      |            |                           | 140                     |                            | 100                        |
| Wet-spinning of HA-SWNT fibers                      | 6           | 65 wt%                 | CHI coagulation bath              | 4                     |                 | 20             |                      | 4.1        |                           | 135                     |                            | 33.3                       |
| PEDOT:PSS/ SWNT paper                               | 7           | 20-50 wt%              |                                   |                       |                 |                |                      |            |                           |                         |                            | 35-104 at 0.2 A $g^{-1}$   |

## References

- 1 S. D. Bergin, V. Nicolosi, H. Cathcart, M. Lotya, D. Rickard, Z. Sun, W. J. Blau and J. N. Coleman, *J. Phys. Chem. C*, 2008, **112**, 972-977.
- 5 2 G. M. Spinks, V. Mottaghitlab, M. Bahrami-Samani, P. G. Whitten and G. G. Wallace, *Adv. Mater.*, 2006, **18**, 637-640.
- 3 J. M. Razal, K. J. Gilmore and G. G. Wallace, *Adv. Funct. Mater.*, 2008, **18**, 61-66.
- 4 J. N. Barisci, M. Tahhan, G. G. Wallace, S. Badaire, T. Vaugien, M. Maugey and P. Poulin, *Adv. Funct. Mater.*, 2004, **14**, 133-138.
- 10 5 M. E. Kozlov, R. C. Capps, W. M. Sampson, V. H. Ebron, J. P. Ferraris and R. H. Baughman, *Adv. Mater.*, 2005, **17**, 614-617.
- 6 C. Lynam, S. E. Moulton and G. G. Wallace, *Adv. Mater.*, 2007, **19**, 1244-1248.
- 7 D. Antiohos, G. Folkes, P. Sherrell, S. Ashraf, G. G. Wallace, P. Aitchison, A. T. Harris, J. Chen and A. I. Minett, *J. Mater. Chem.*, 2011, **21**, 15987-15994.
